# Supplementary material for: Crowding-induced phase separation and gelling by co-condensation of PEG in NPM1-rRNA condensates
Source: PubMed Central journal article supplement — Biophys J. 2022 Dec 5;122(2):397–407. doi: 10.1016/j.bpj.2022.12.001 (PMC9892608; doi:10.1016/j.bpj.2022.12.001), 2022-12-05
Supplement: mmc1.pdf [file mmc1.pdf]

**Biophysical Journal, Volume 122**

**Supplemental information**

**Crowding-induced phase separation and gelling by co-condensation of  
PEG in NPM1-rRNA condensates**

**Alain A.M. André, N. Amy Yewdall, and Evan Spruijt**

# Supporting information

## Crowding-induced phase separation and gelling by co-condensation of PEG in NPM1-rRNA condensates

Alain A.M. André<sup>1</sup>, N. Amy Yewdall<sup>1</sup>, Evan Spruijt<sup>1\*</sup>

<sup>1</sup> Institute for Molecules and Materials, Radboud University, Heyendaalseweg 135, 6525 AJ Nijmegen, the Netherlands.

\* Correspondence: [e.spruijt@science.ru.nl](mailto:e.spruijt@science.ru.nl)

### Supplementary Figures

|                |   |
|----------------|---|
| Figure S1..... | 2 |
| Figure S2..... | 3 |
| Figure S3..... | 4 |
| Figure S4..... | 4 |
| Figure S5..... | 5 |
| Figure S6..... | 5 |
| Figure S7..... | 6 |

**Figure S1**

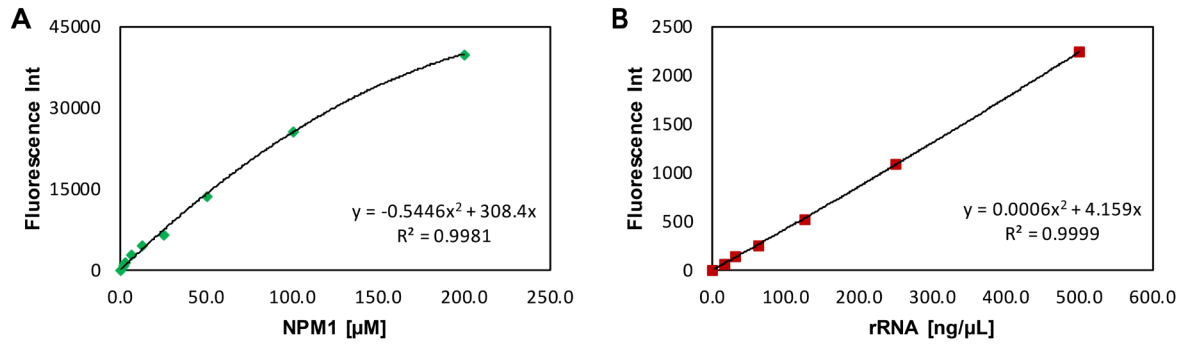

**Figure S1: Calibration curves for NPM1 and rRNA.** Calibration curves of known concentrations of NPM1 (A) and rRNA (B) that were used to calculate the dilute phase concentrations.

**Figure S2**

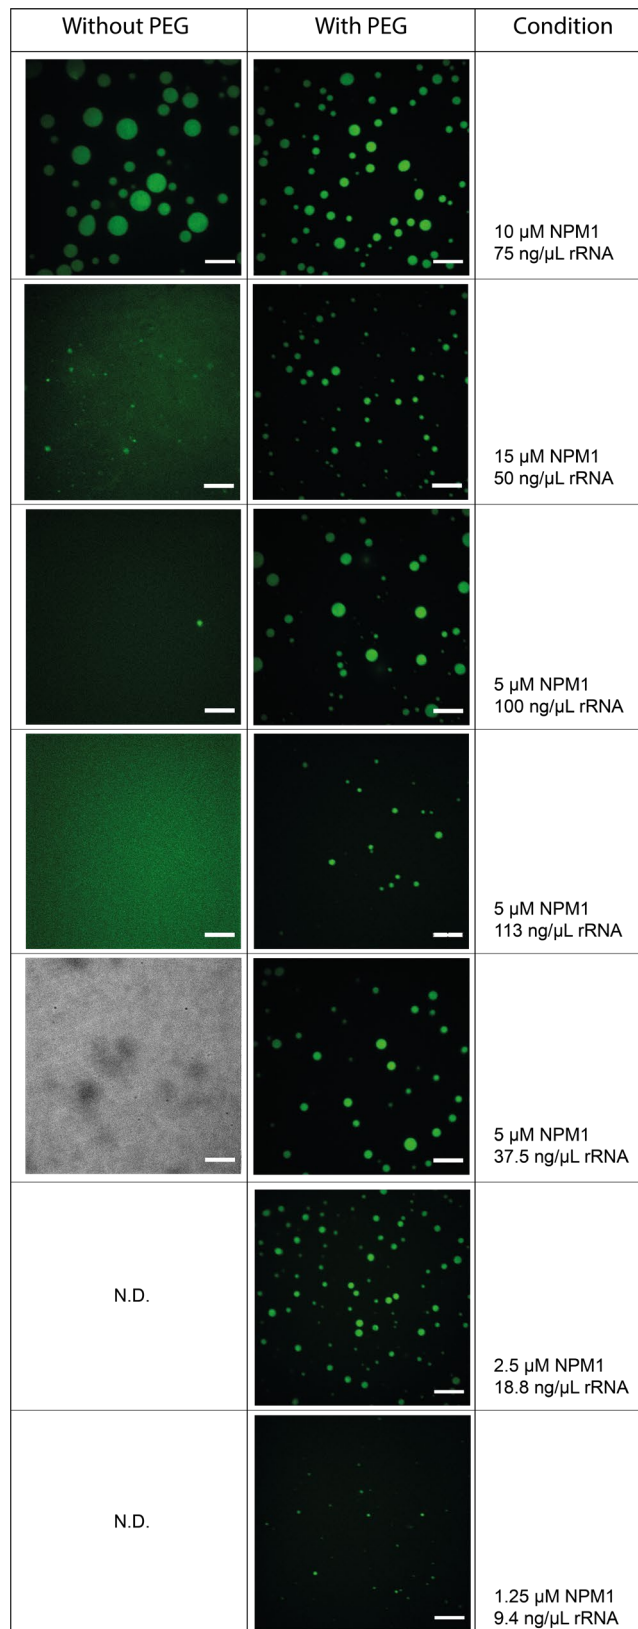

**Figure S2: Microscopic assessment of PEG induced phase separation.** Varying NPM1 and rRNA concentrations were prepared and examined by fluorescence microscopy for condensation in the absence (0 wt%) or presence (2 wt%) PEG. We defined condensates by the presence of spherical spots with a diameter larger than 2 μm. All scale bars are 10 μm.

**Figure S3**

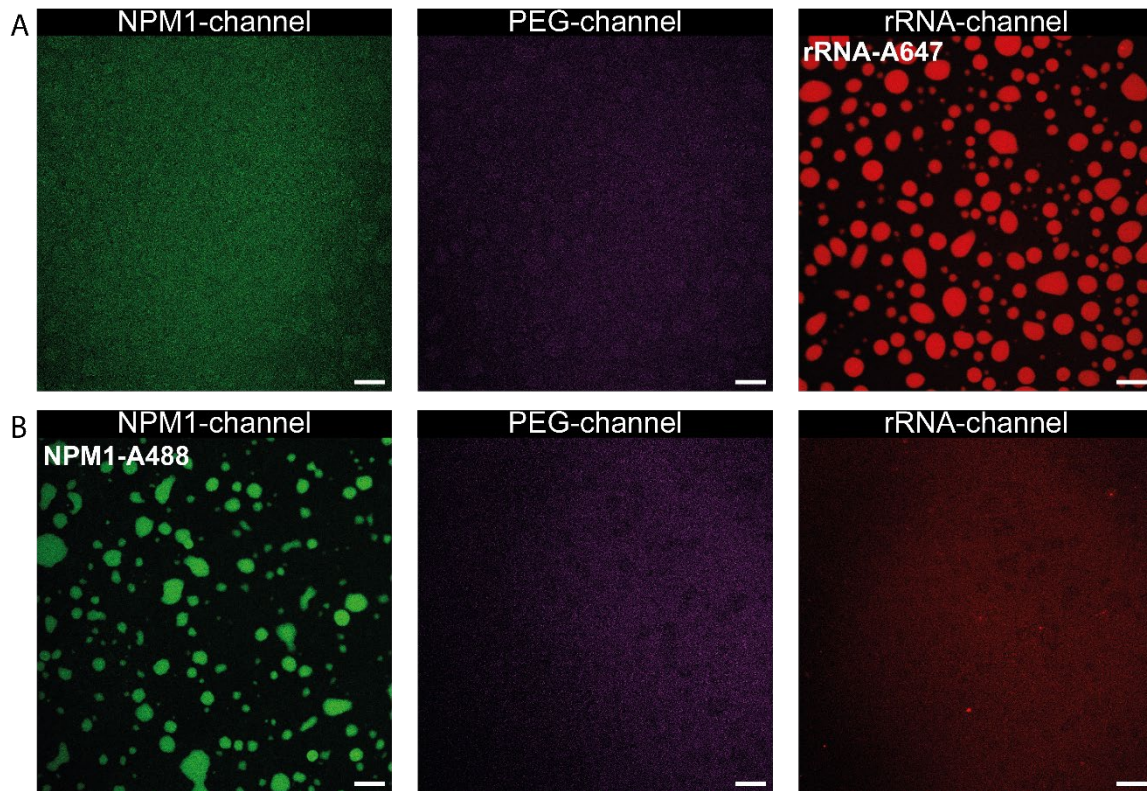

**Figure S3: Bleed through experiment of Alexa dyes in the PEG-channel.** Control experiment to show the lack of bleed through of the fluorescent dyes from rRNA-A647 and NPM1-A488 in the PEG-channel (573 excitation, 583-649 nm emission filter). (A) NPM1-rRNA condensates with only Alexa647 labelled rRNA. (B) NPM1-rRNA condensates with only Alexa488 labelled NPM1. All scale bars are 10 μm.

**Figure S4**

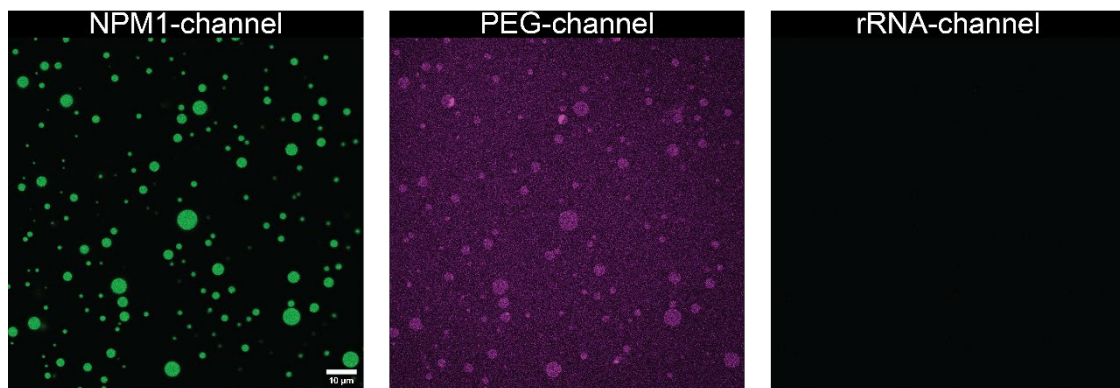

**Figure S4: Homotypic NPM1 droplets.** Fluorescent microscopy images of NPM1-NPM1 droplets in the presence of 5 wt% PEG-rhodamine. These droplets are characterized by a partitioning coefficient ( $K_p$ ) of 50 for NPM1-A488, and a  $K_p$  of 2 for PEG-rhodamine. Scale bar is 10 μm.

**Figure S5**

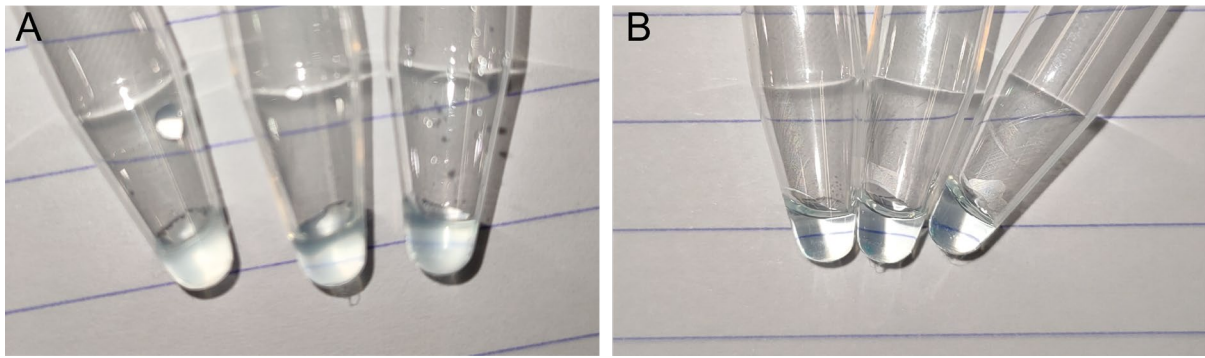

**Figure S5: Separation of dilute and condensed phase.** (A) Pictures showing turbid suspensions of NPM1-rRNA condensates before centrifugation and (B) clarified solutions with a tiny pellet of condensed phase after 20 minutes of centrifugation.

**Figure S6**

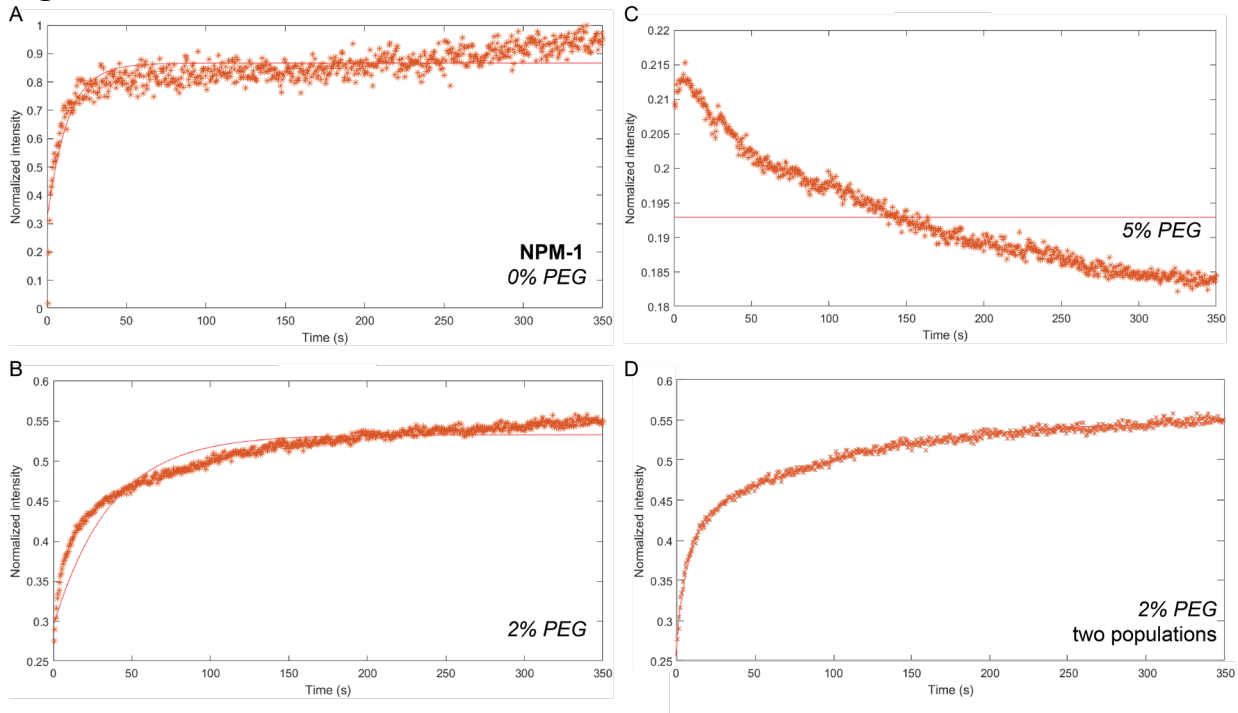

**Figure S6: Curve fitting for the fluorescence recovery after photobleaching of NPM1-A488.** Zoomed in curve fitting for the FRAP data of NPM1 in the presence of (A) 0% PEG, (B) 2% PEG, (C) 5% PEG, (D) 2% PEG fitted with two populations. For 5% PEG (C) instead of recovery, a slow bleaching of the spot caused by the imaging was observed. The recovery half times ( $t_{1/2}$  of the fit in D are 5 s and 71 s, respectively).

**Figure S7**

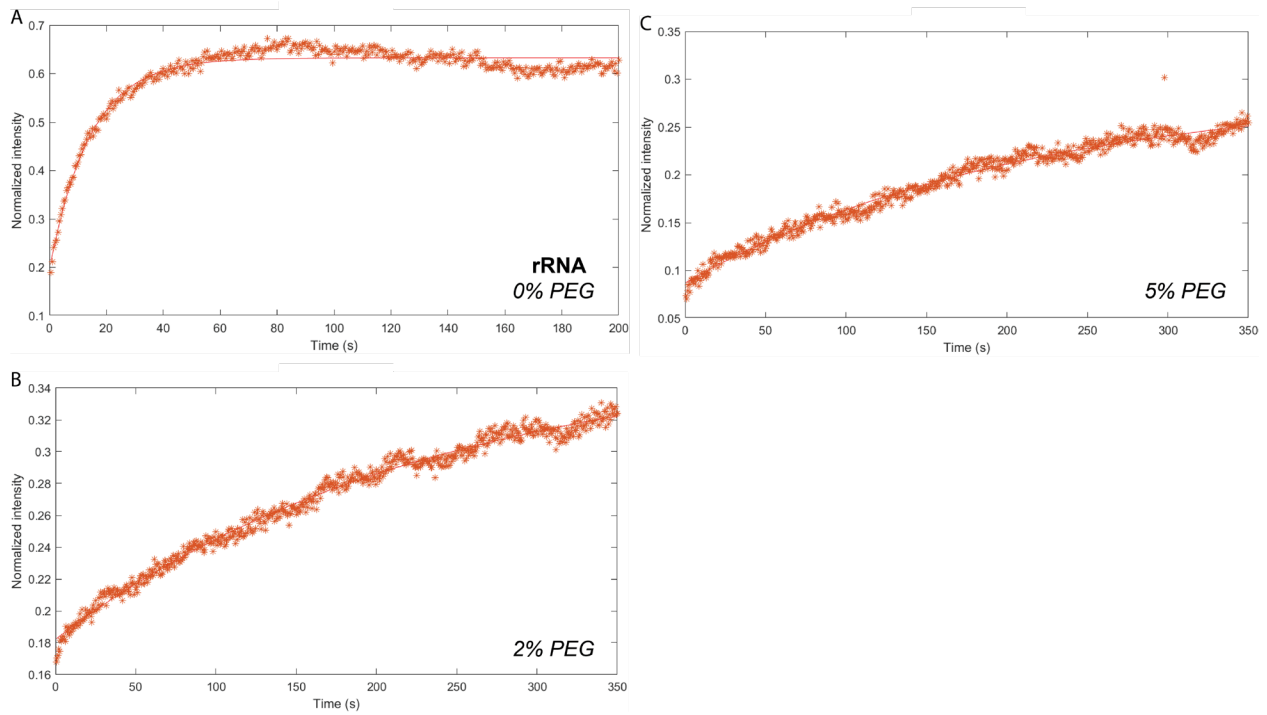

**Figure S7: Curve fitting for the fluorescence recovery after photobleaching of rRNA-A647. Zoomed in curve fitting for the FRAP data of rRNA in the presence of (A) 0% PEG, (B) 2% PEG, (C) 5% PEG.**
